# Supplementary material for: FX5 as a non-steroidal GR antagonist improved glucose homeostasis in type 2 diabetic mice via GR/HNF4α/miR-122-5p pathway
Source: publisher site journal article supplement (doi:10.18632/aging.202275), 2020-12-09
Supplement: Supplementary file [file aging-v13i2-202275-supplementary-material-SD1.pdf]

**SUPPLEMENTARY FIGURES**

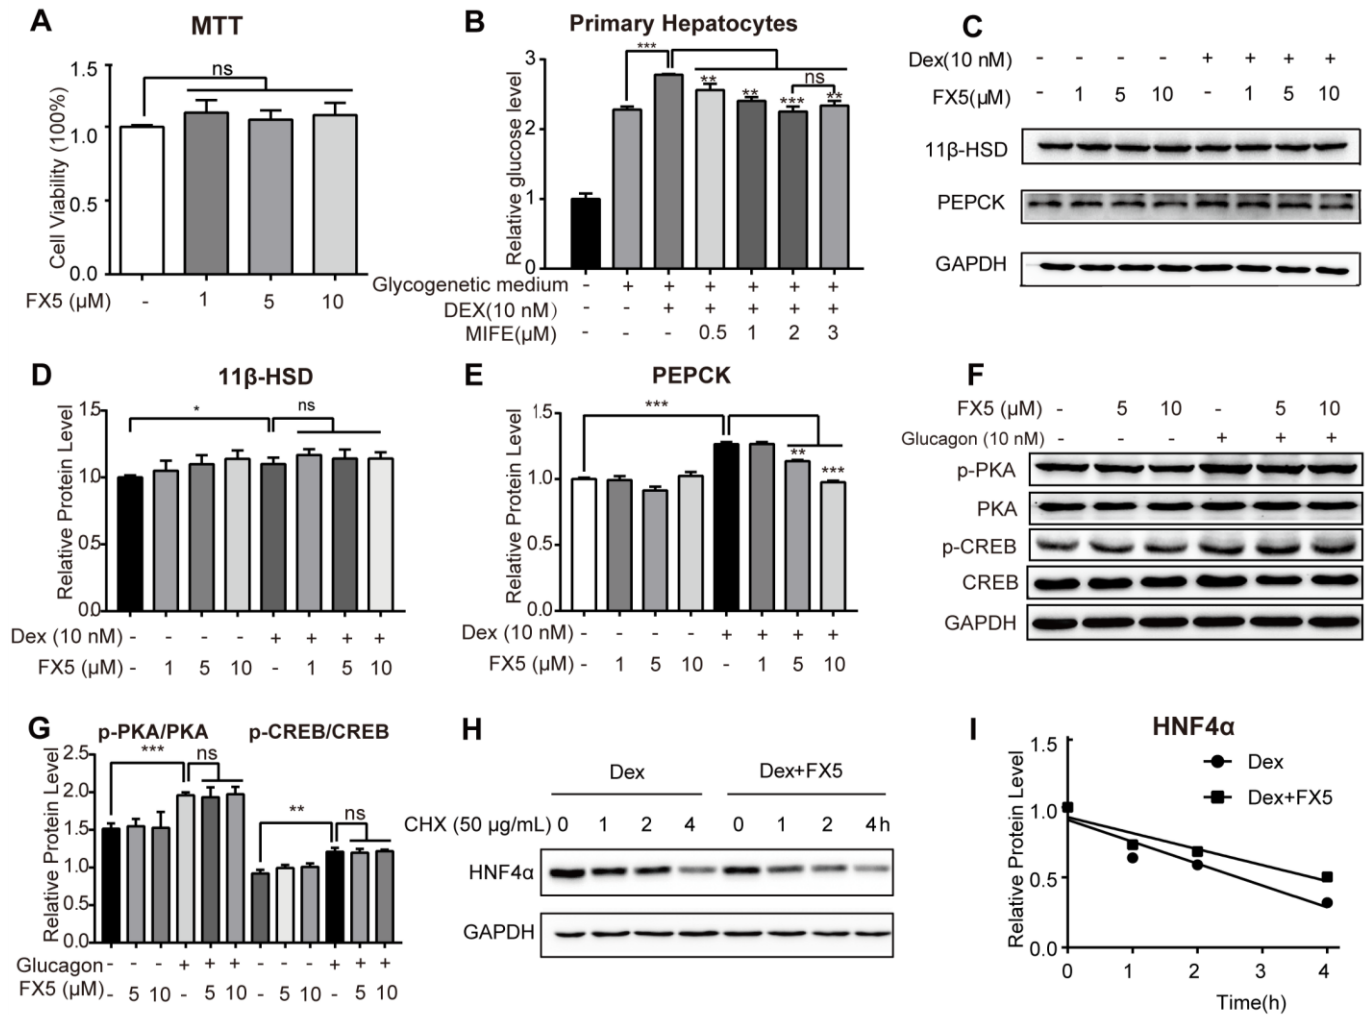

**Supplementary Figure 1. FX5 regulated gluconeogenesis independent of repression of 11β-HSD protein level, regulation of PKA/CREB signaling or degradation of HNF4α in primary hepatocytes.** (A) Mouse primary hepatocytes were treated with different concentrations of FX5 (1, 5, 10 μM) for 24 h, and cell viability was detected by MTT assay. (B) Primary hepatocytes were pretreated with glucagon (10 nM) and different concentration of mifepristone (MIFE) (0.5, 1, 2, 3 μM) for 12 h, and then cultured for another 6 h in glycogenetic medium with glucagon and MIFE. Finally, glucose level in the medium was measured. (C) Mouse primary hepatocytes were incubated with 10 nM Dex and different concentrations of FX5 (1, 5, 10 μM) for 6 h. Finally, protein levels of 11β-HSD, PEPCK and GAPDH were tested by western blot assay. Quantification of (D) 11β-HSD and (E) PEPCK protein levels, all results were normalized to GAPDH. (F) FX5 (5, 10 μM) with or without Dex (10 nM) was incubated in mouse primary hepatocytes for 6 h, and protein levels of PKA-CREB signaling pathway were detected by Western blot. (G) Quantification of p-PKA and p-CREB protein levels. (H) Mouse primary hepatocytes were pretreated with Dex (10 nM) and FX5 (10 μM) for 4 h, followed by incubation with 50 μg/mL CHX in medium for 0, 1, 2 and 4 h. Protein level of HNF4α was tested by western blot. (I) Quantification of HNF4α protein level normalized to GAPDH. Horizontal axis stands for the incubated time with CHX, and vertical axis for HNF4α/GAPDH.

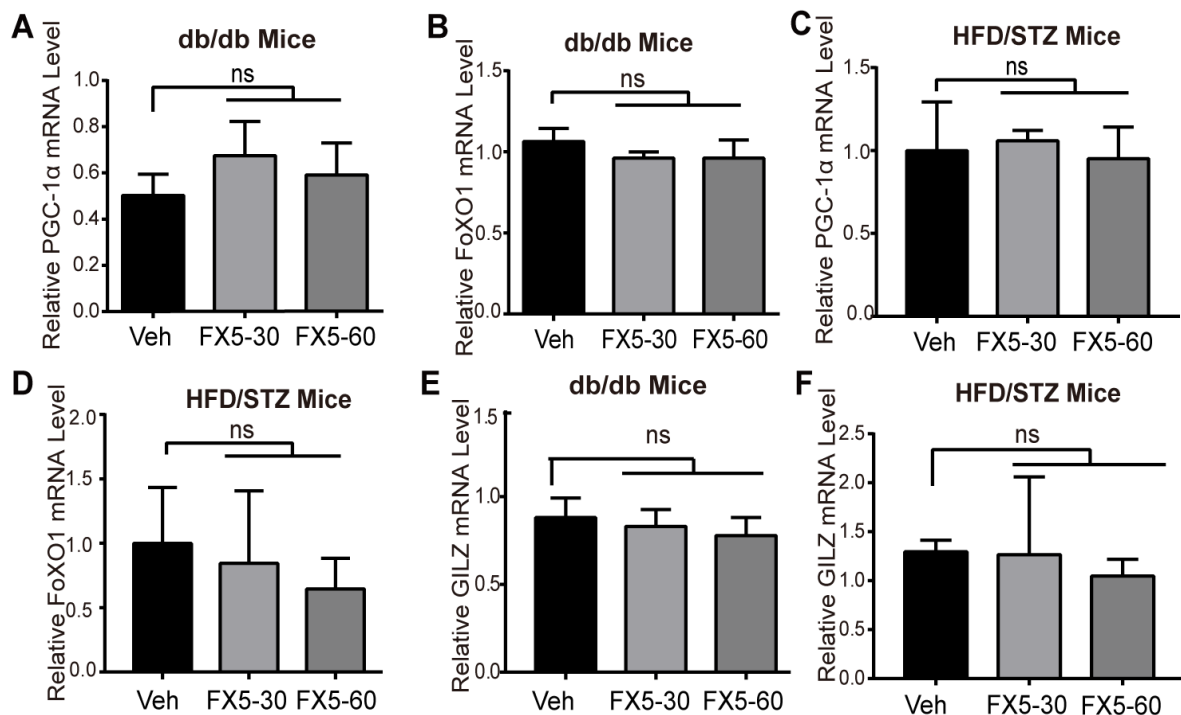

**Supplementary Figure 2. FX5 had no effects on the mRNA levels of PGC-1α, FOXO1 or GILZ in the liver tissues of T2DM mice.** mRNA levels of PGC1α and FoxO1 in liver tissue of (A, B) *db/db* mice and (C, D) HFD/STZ-induced T2DM mice were measured by quantitative RT-PCR assay, and results were normalized to GAPDH. mRNA level of GILZ was detected in liver tissue of (E) *db/db* and (F) HFD/STZ-induced T2DM mice. All results were presented as mean ± S.E.M (\* $P < 0.05$ , \*\* $P < 0.01$  and \*\*\* $P < 0.001$ ).

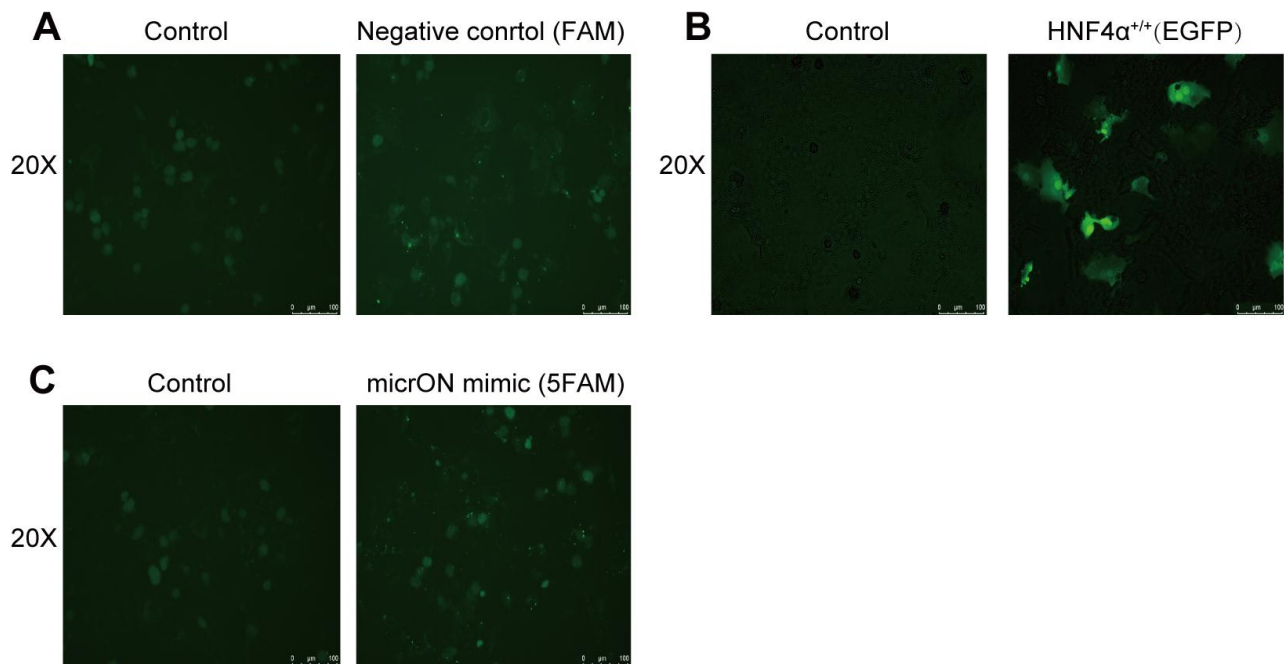

**Supplementary Figure 3. Transfection efficiency of plasmids in primary hepatocytes.** Primary hepatocytes were transduced with (A) small interference negative control (FAM), (B) HNF4α overexpression plasmid (EGFP) and (C) micrON mimic NC #22 (FAM) for 48h, and images were taken using a fluorescence microscope.

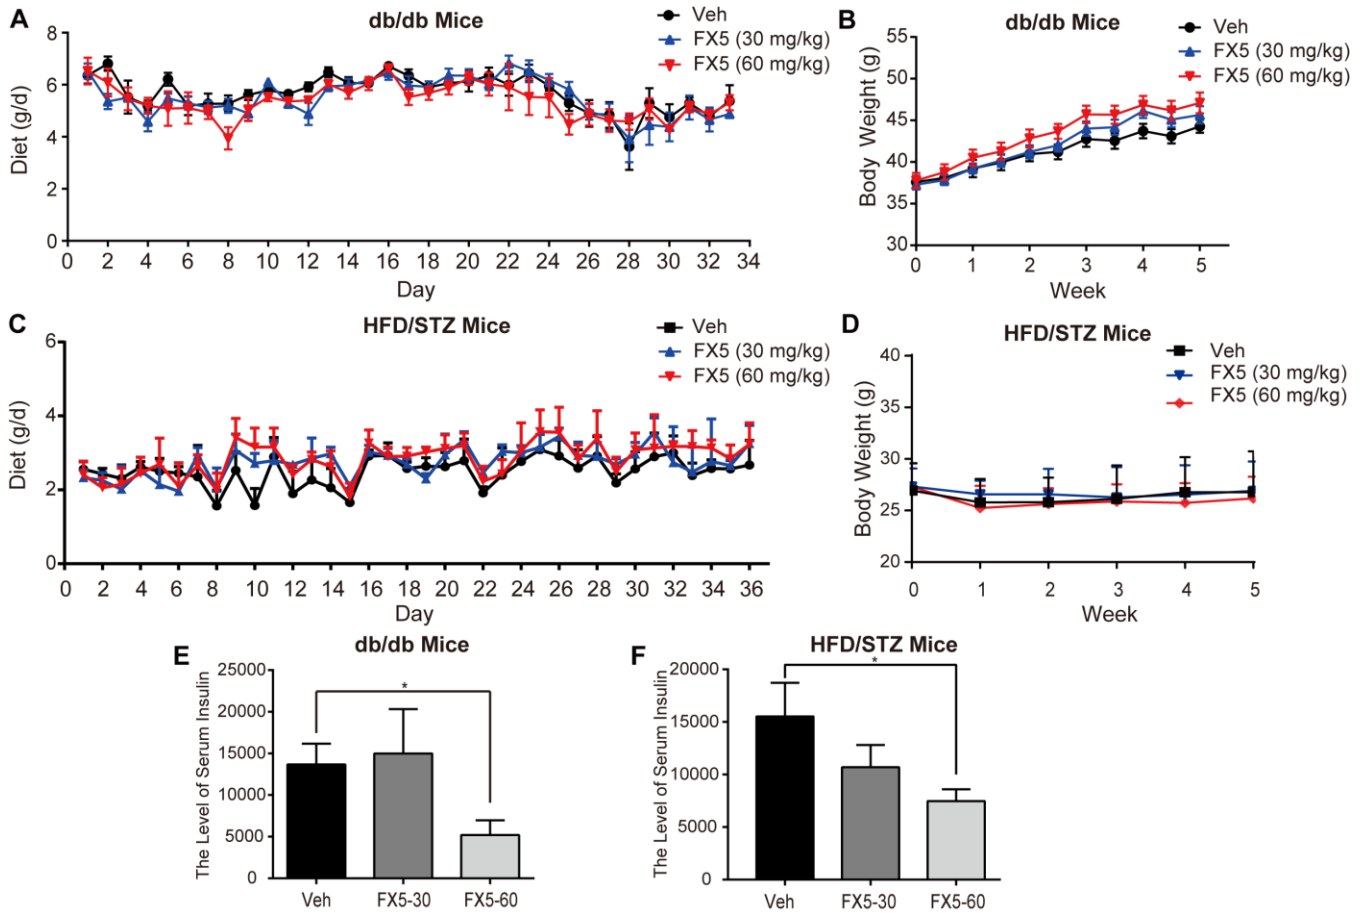

**Supplementary Figure 4. FX5 treatment had no effects on food intake or body weight but decreased serum insulin level of *db/db* and HFD/STZ induced diabetic mice. (A) Food intake and (B) body weight of *db/db* mice during the treatment. (C) Food intake and (D) body weight of HFD/STZ mice during the treatment. (E) Serum insulin level of *db/db* mice. (F) Serum insulin level of HFD/STZ mice.**
