# Supplementary material for: FX5 as a non-steroidal GR antagonist improved glucose homeostasis in type 2 diabetic mice via GR/HNF4α/miR-122-5p pathway
Source: publisher site journal article supplement (doi:10.18632/aging.202275), 2020-12-09
Supplement: Supplementary file [file aging-v13i2-202275-supplementary-material-SD2.pdf]

## SUPPLEMENTARY TABLE

Supplementary Table 1. List of mouse primer sequences for RT-PCR assay.

| <b>Primer</b>  | <b>Forward</b>          | <b>Reverse</b>              |
|----------------|-------------------------|-----------------------------|
| G6Pase         | CGACTCGCTATCTCCAA GTGA  | GTTGAACCA GTCTCCGACCA       |
| PEPCK          | CTGCATAACGGTCTGGACTTC   | CAGCAACTGCCCGTACTCC         |
| HNF4 $\alpha$  | GGCAATGACA CGTCCCCATCTG | GCCTGCA GTAA CGA CACTGGTTCC |
| FoxO1          | CCCAGGCCGGA GTTTAACC    | GTTGCTCATAAAGTCGGTGCT       |
| PGC-1 $\alpha$ | TTCTGGGFGGATTGAA GTGGTG | TGTCAGTGCATCAAATGAGGGC      |
| GILZ           | CAGCTGCACAATTTCTC       | CATCAGGTGGTTCTTCAC          |
| GR             | TGCTATGCTTTGCTCCTGATCTG | TGTCAGTTGATAAAACCGCTGC      |
| GAPDH          | ACAGCAACAGGGTGGTGGAC    | TTTGAGGGTGCA GCGAACTT       |
| miR122-5p      | TGGAGTGTGACAATGGTGT TTG |                             |
